# Supplementary material for: Diverse functional genes harboured in extracellular vesicles from environmental and human microbiota
Source: PubMed Central journal article supplement — J Extracell Vesicles. 2022 Dec 3;11(12):12292. doi: 10.1002/jev2.12292 (PMC9719567; doi:10.1002/jev2.12292), 2022-12-03
Supplement: JEV2-11-12292-s001.pdf [file JEV2-11-12292-s001.pdf]

1  
2  
3  
4  
5  
6  
7  
8  
9  
10

## Additional information for

Diverse functional genes harbored in extracellular vesicles from environmental and human microbiota

**Authors:** Li-Ting Zhu<sup>1,2#</sup>, Hai-Ning Huang<sup>1#</sup>, Ricardo David Avellán-Llaguno<sup>1</sup>, Yifei Qin<sup>1,2</sup>, Xin-Li An<sup>1</sup>, Jian-Qiang Su<sup>1</sup>, Qiansheng Huang<sup>1,3\*</sup>, Yong-Guan Zhu<sup>1\*</sup>

Correspondence to: Q.S. H ([qshuang@iue.ac.cn](mailto:qshuang@iue.ac.cn)), Y.G. Z ([ygzhu@iue.ac.cn](mailto:ygzhu@iue.ac.cn))

11 **This file includes:**

12

13       Supplementary Methods

14       Extended Data Figs. 1 to 8

15       Captions for supplementary table 1 to 9

16

17 **Other Supplementary Materials for this manuscript include the following:**

18

19       Supplementary Table 1 to 9 as separate Excel files

20

## 21 **Supplementary Methods**

22 **Isolation of an ampicillin-resistant *E. coli* strain E4742.** *E. coli* strain E4742 was isolated  
23 from wastewater following the procedure as below. The wastewater sample was diluted 1,000  
24 times with PBS, and then 100 µl diluent was spread on LB solid medium containing 64 mg/l  
25 Ampicillin (Sigma-Aldrich) for 24 h at 37°C. Colonies were picked and purified on the  
26 ampicillin solid medium for 2 to 3 times to isolate resistant bacteria. A single resistant bacterial  
27 colony was obtained and applied for 16S rRNA gene sequencing. The primer sequences were  
28 16S-27F (5'-AGAGTTTGATCCTGGCTCAG-3') and 16S-1492R (5'-  
29 GGTTACCTTGTTACGACTT-3'). The reaction conditions consisted of 1 cycle of 5 min at  
30 94°C for the initial denaturation, followed by 30 cycles of denaturation (95°C, 30 s), annealing  
31 (56°C, 30 s), and extension (72°C, 90 s), and a final extension step at 72°C for 10 min. After the  
32 PCR products were isolated by 1% agarose gel electrophoresis, Sanger sequencing was  
33 performed using ABI 3730XL DNA Analyzer (Applied Biosystems). The sequenced 16S rRNA  
34 sequence was blasted on the EzBioCloud's database website (<http://www.ezbiocloud.net>) and  
35 was found to show high similarity with that of *E. coli* strain E4742<sup>60</sup>.

36 **Isolation of EVs from faeces by iodixanol density gradient centrifugation.** Bottom-up density  
37 gradient centrifugation was performed according to a previous protocol with some  
38 modifications<sup>61,62</sup>. Briefly, 10%, 20% and 40% iodixanol density media (Sigma-Aldrich) were  
39 prepared by mixing with gradient buffer immediately. 50% iodixanol were prepared by mixing  
40 with a crude extract. The bottom-loaded 10%, 20%, 40%, and 50% gradients and 1 mL of PBS  
41 on the surface of the liquid were subjected to ultracentrifugation at 100,000 × g for 16 h at 4°C  
42 using a SW41 Ti rotor. Twelve individual fractions (each with 1 ml) were collected from the top  
43 of the centrifugation tube. EVs were enriched in the fractions with density from 1.083 to 1.201

44 g/ml, which was around 4-9 fraction from top to bottom. Combined fractions were resuspended  
45 in PBS and subjected to ultracentrifugation at  $100,000 \times g$  for 2 h at  $4^{\circ}\text{C}$ .

46 **Transmission electron microscopy (TEM).** 8  $\mu\text{l}$  of EVs samples were placed on carbon-coated  
47 300-mesh copper grid. After 5 min, the grid was washed with 1 mM EDTA (pH=8.0) for 10 s,  
48 stained with 2% uranyl acetate for 1 min, then allowed to dry. The image was taken using  
49 transmission electron microscope (Hitachi S4800, Japan) at an accelerating voltage of 100 kV.

50 **Scanning Electron Microscopy (SEM).** Culture media (1 ml) from *E. coli* E4742 at exponential  
51 growth stage was centrifuged (3,000 g for 10 min) to collect the bacteria. The bacteria pellet was  
52 rinsed twice with 0.1 M PBS and fixed with 2.5% glutaraldehyde overnight at  $4^{\circ}\text{C}$ . Then, the  
53 samples were dehydrated through a series of graded concentrations of ethanol (30%, 50%, 70%,  
54 80%, 90%, 100% ethanol; 10 min each). After dehydration, the samples covered with filter paper  
55 were dried with a critical point dryer (Autosamdri 815 automatic critical point dryer apparatus,  
56 Tousimis, USA) overnight, sputter coated with gold, and then examined under an electron  
57 microscope (Hitachi S4800, Japan).

58 **Absolute quantification of 16S rRNA gene copies.** The absolute copy number of 16S rRNA  
59 gene was measured by Roche 480 using a SYBR<sup>®</sup> Green approach. A volume of 20  $\mu\text{l}$  reaction  
60 solution was prepared including 10  $\mu\text{l}$  2 $\times$  Light Cycler 480 SYBR<sup>®</sup> Green I Master Mix (Roche  
61 Inc., USA), 1  $\mu\text{M}$  of each primer (341 F: 5'- CCTACGGGNGGCWGCAG-3' and 806 R: 5'-  
62 GGACTACHVGGGTWTCTAAT-3'), 1  $\mu\text{l}$  DNA template, and 7  $\mu\text{l}$  nuclease-free water. PCR  
63 amplification was carried out with Roche 480 using the protocol of initial pre-incubation at  $95^{\circ}\text{C}$   
64 for 5 min, 40 cycles of  $95^{\circ}\text{C}$  for 15 s,  $60^{\circ}\text{C}$  for 1 min, and  $72^{\circ}\text{C}$  for 15 s. An eight-point  
65 calibration curve was made by 10-fold dilution of a standard plasmid containing a cloned and

66 sequenced 16S rRNA gene fragment ( $1.39 \times 10^{10}$  copies/l) to apply external standard calculation.  
67 The PCR reaction was run in triplicate with negative and positive controls.  
68 **Comparison of EVs-associated 16S rDNA copies between differential centrifugation and**  
69 **density gradient centrifugation.** The absolute quantification of 16S rRNA genes was applied to  
70 estimate the concentration of bacteria in the field samples contributing DNA to the EVs. Each of  
71 three fecal samples was divided equally into two, and then applied to differential centrifugation  
72 and density gradient centrifugation, respectively. Then, the obtained EVs were treated with  
73 DNase, and the extracted DNA were applied to 16S rDNA quantification.

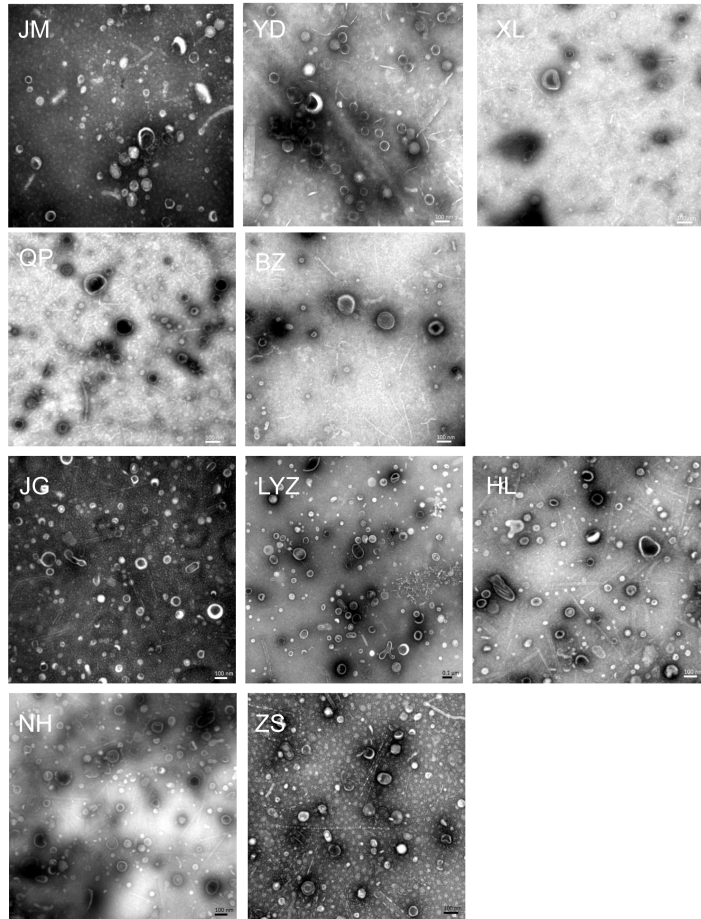

74

75 **Extended Data Fig. 1 | Representative transmission electron microscopy of EVs from**  
76 **wastewater samples ( JM, YD, XL, QP, BZ ) and soil samples (JG, LYZ, HL, NH, ZS).**

77 **scale bar, 100 nm.**

78

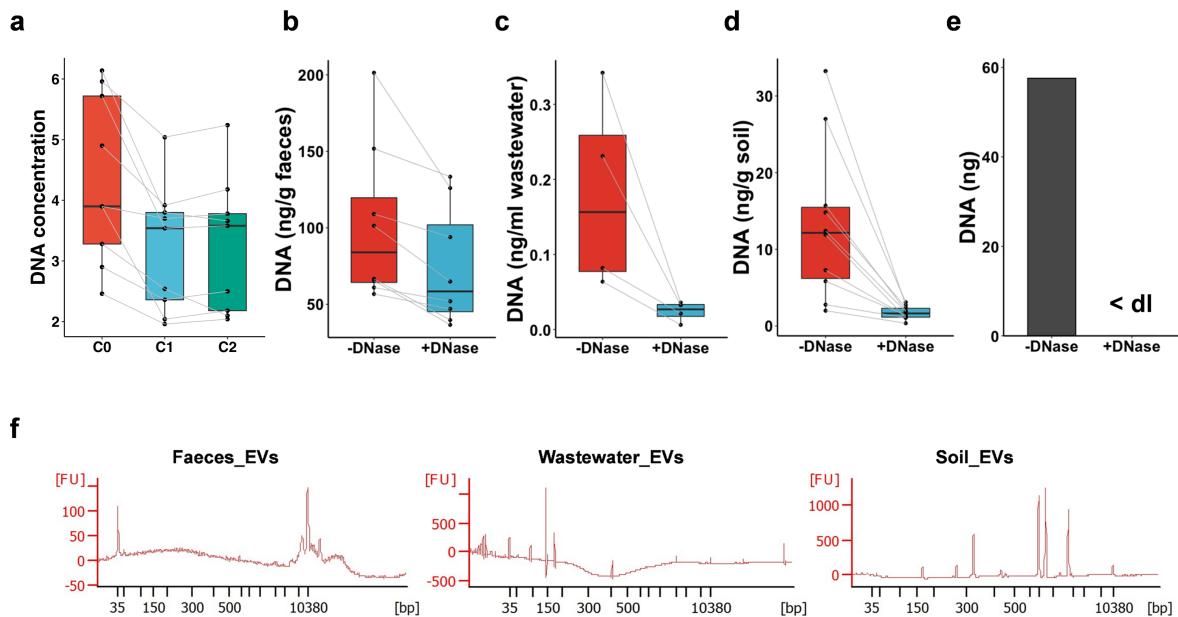

79

80 **Extended Data Fig. 2| Quantitation and characterization of EVs-associated DNA.** a, C0 is  
 81 the initial DNA concentration of the sample, C1 is the DNA concentration after 1st DNase  
 82 treatment, C2 is the DNA concentration after 2nd DNase treatment. EVs from the same faeces  
 83 were linked by grey lines. EVs from **b**, faeces, **c**, wastewater, **d**, soil were treated with two  
 84 rounds of 2 U Turbo DNase at 37°C for 30 min. Then, the levels of double strand DNA were  
 85 assayed by Qubit 4.0 Fluorometer. Data were expressed as (middle line, median; lower hinge,  
 86 first quartile; upper hinge, third quartile; lower whisker, the smallest value at most 1.5 × the  
 87 interquartile range from the hinge; upper whisker, the largest value no further than 1.5 × the  
 88 interquartile range from the hinge; data beyond the whiskers were outlying points). Each sample  
 89 before and after DNase treatment were linked by grey lines. **e**, Total DNA from wastewater  
 90 bacteria (after dilution) was used as control. ‘< dl’ indicates that concentrations were below the  
 91 assay detection limit (10 pg/μl). **f**, Bioanalyzer electropherograms of Size distribution of EVs-  
 92 associated DNA fragments. Purified EVs-associated DNA from faeces, wastewater and soil, pre-

93 treated with DNase was analyzed with an Agilent Bioanalyzer High Sensitivity DNA assay. One  
94 representative figure for each EVs population were shown. Peaks at 35 bp and 10380 bp were  
95 from exogenous standard DNA fragments. FU, fluorescence units.

96



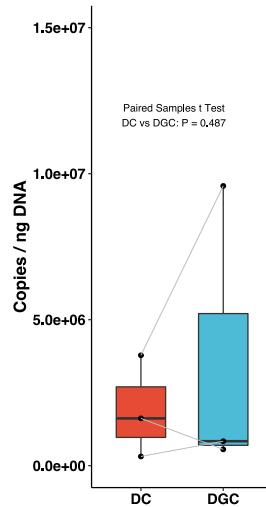

97

98 **Extended Data Fig. 3| Quantitation of 16S rDNA copies of fecal EVs derived from**  
 99 **differential centrifugation (DC) and density gradient centrifugation (DGC), respectively.**

100 **Half of each** fecal sample **were applied to** DC and DGC process, respectively. Then, EVs were  
 101 treated with DNase treatment before DNA extraction. The red ones represent the DC group, the  
 102 blue ones represent the DGC group, and the dots represent the samples. Data were expressed as  
 103 (middle line, median; lower hinge, first quartile; upper hinge, third quartile; lower whisker, the  
 104 smallest value at most  $1.5 \times$  the interquartile range from the hinge; upper whisker, the largest  
 105 value no further than  $1.5 \times$  the interquartile range from the hinge; data beyond the whiskers were  
 106 outlying points). EVs from the same faeces were linked by grey lines. Paired sample t-test was  
 107 used for significance test. n=3.

108

109

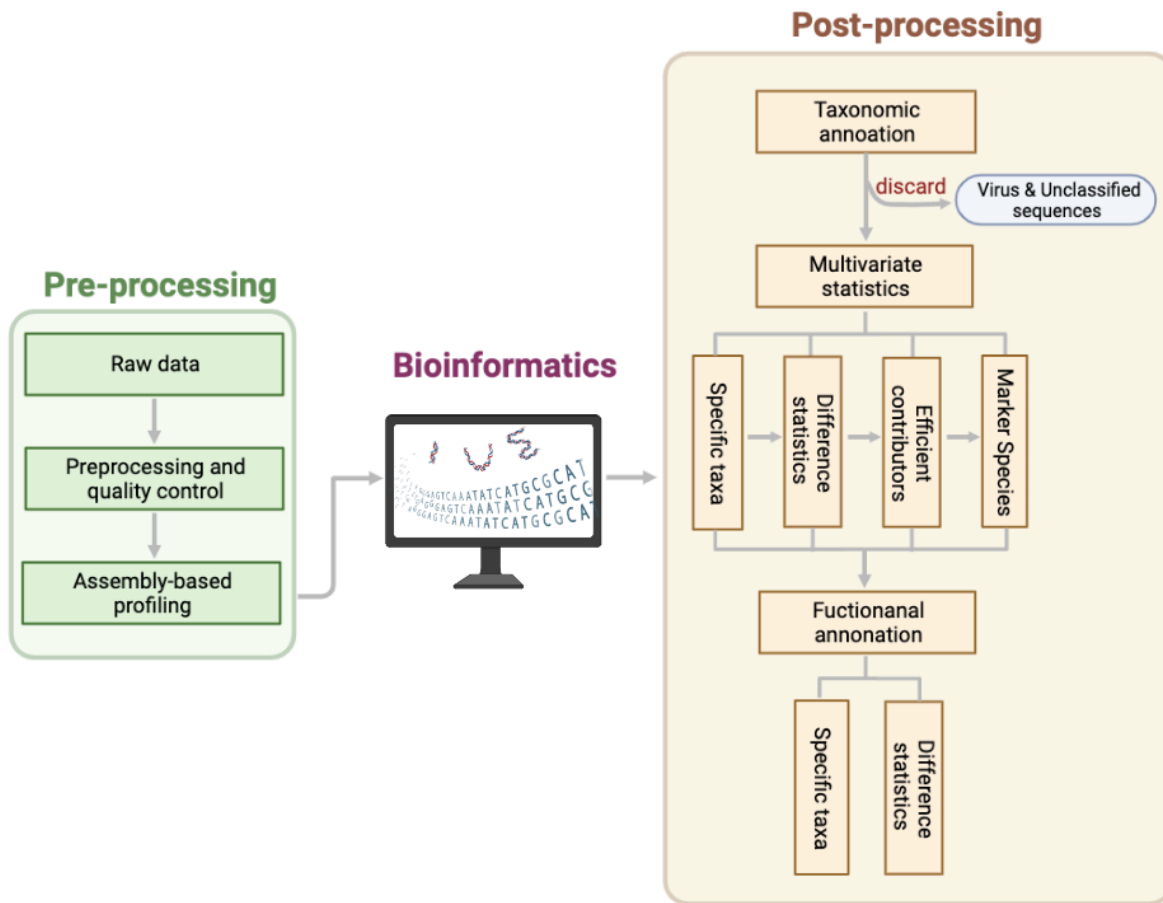

110

111 **Extended Data Fig. 4 | Summary of a bioinformatic workflow.** This flow included pre-

112 processing and post-processing for bioinformatic analysis.

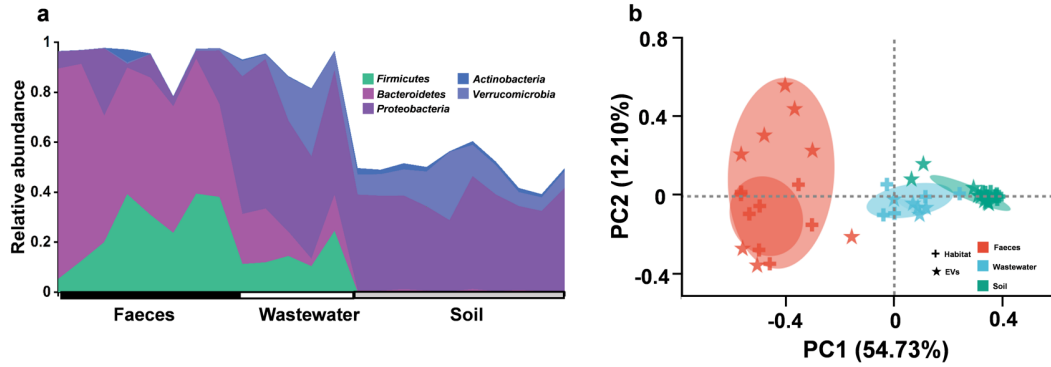

113

114 **Extended Data Fig. 5| Composition of microbiota and EVs in different habitats.** **a**, The  
 115 median relative abundance of microbes at the phylum level (faeces, n = 8; wastewater, n=5; soil,  
 116 n=10). **b**, Principal co-ordinates analysis (PCoA) plots of Bray-Curtis distance of microbial  
 117 composition at the phylum level. The composition was driven by different habitats. Each dot  
 118 represents one individual sample. Sampling types are colored, with plus and asterisk indicating  
 119 microbiota samples and EVs samples, respectively. Ellipses represented the 95% confidence  
 120 interval.

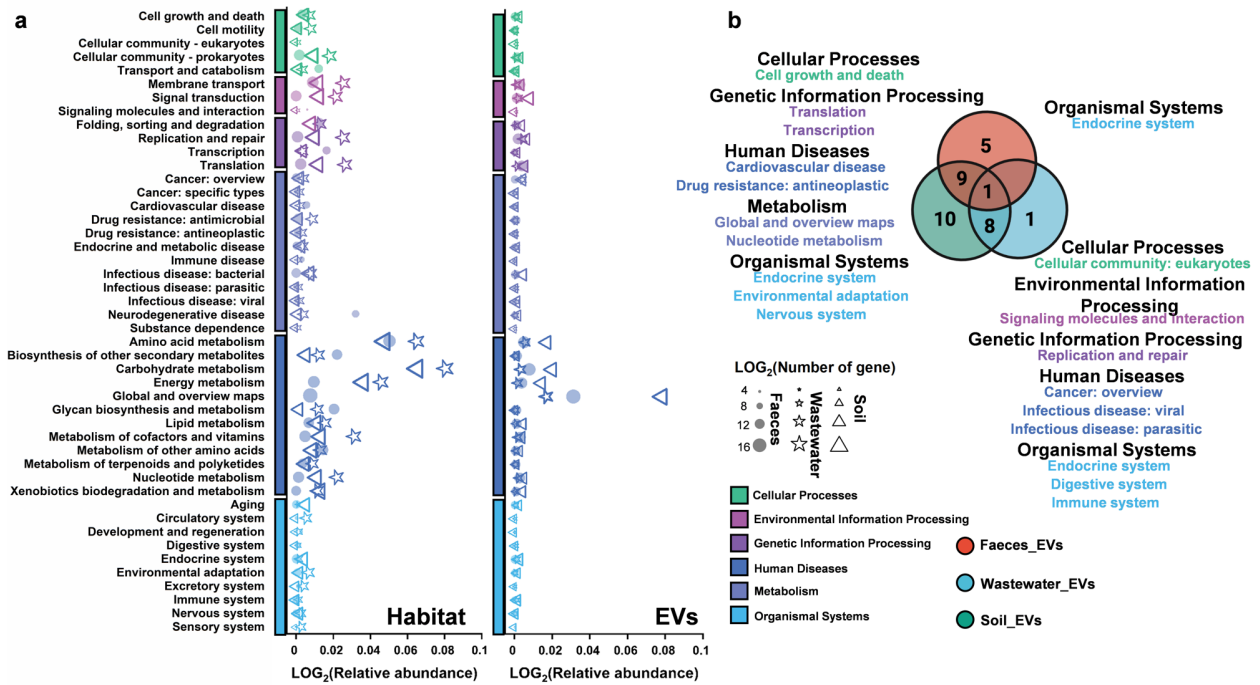

121

122 **Extended Data Fig. 6| Diversity and distribution of functional categories in the habitat**

123 **samples and corresponding EVs samples. a,** Comparison between the habitats and EVs on

124 level 2 of KEGG functional category. The dots represent samples of faeces and fecal vesicles,

125 the stars indicate wastewater and EVs of wastewater, and the triangles show soil and EVs of soil.

126 Different colors indicate different functional categories. **b,** The Venn diagram shows the number

127 of overlapping and unique KEGG categories.

128

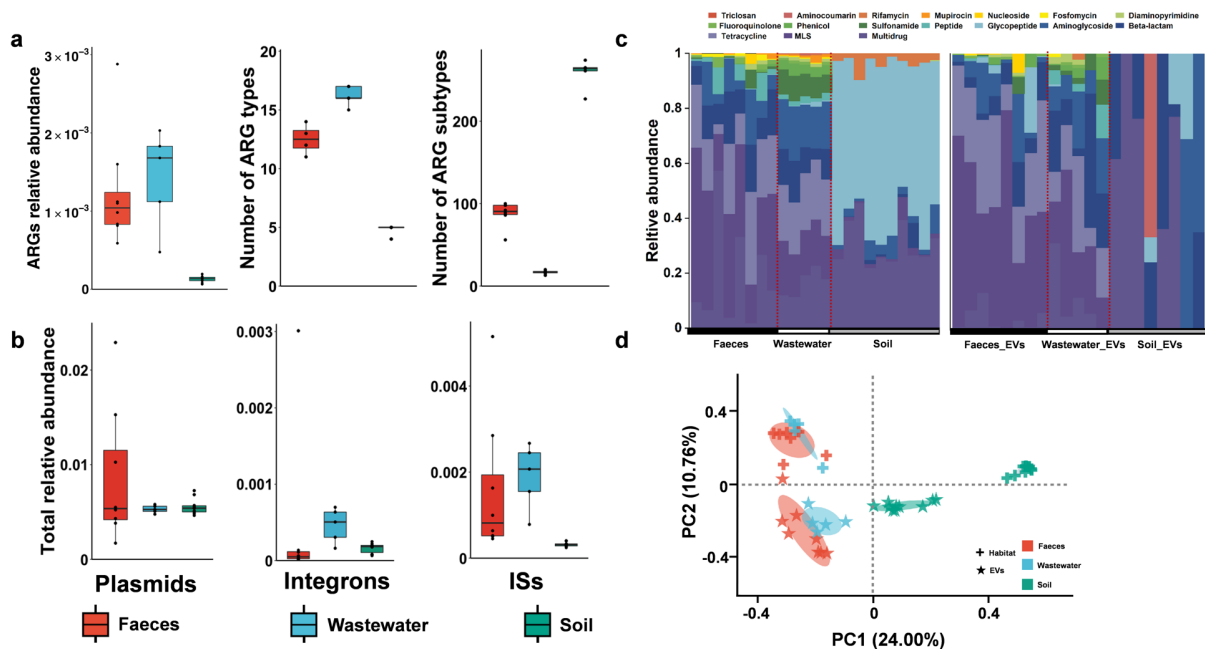

129

130 **Extended Data Fig. 7 | Characterization of ARG and MGE profiles in the microbiota from**

131 **each habitat. a**, Different levels of ARGs, including total relative abundance, antibiotic types,

132 and antibiotic subtypes. Data were presented as box plots (middle line, median; lower hinge, first

133 quartile; upper hinge, third quartile; lower whisker, the smallest value at most  $1.5 \times$  the

134 interquartile range from the hinge; upper whisker, the largest value no further than  $1.5 \times$  the

135 interquartile range from the hinge; data beyond the whiskers were outlying points). **b**, Total

136 relative abundance of MGEs (plasmids, integrons and ISs). **c**, Characterization of ARG profiles

137 in EVs and microbiota from corresponding habitats. The bars indicate the proportion of different

138 ARG types as marked by colors. **d**, The interindividual variation of ARGs composition. PCoA

139 plots of Bray-Curtis distance of the ARG subtypes in different samples. Each dot represents one

140 sample. Sampling types are colored, with plus and asterisk indicating microbiota from habitat

141 and EVs samples, respectively.

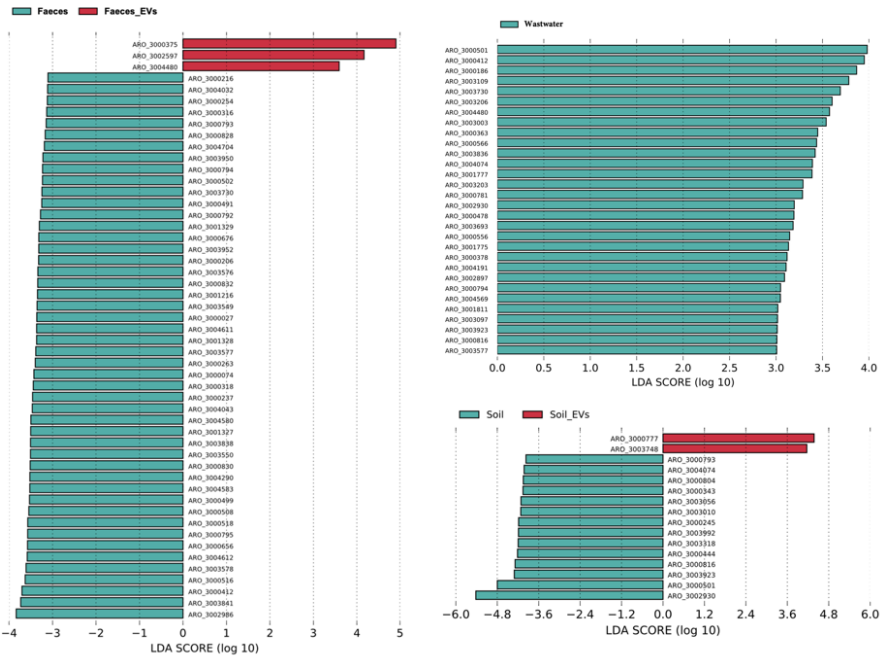

142

143

**Extended Data Fig. 8 | Characterization of ARG profiles.** Differentially abundant ARGs at

144

type level between EVs and their habitats were revealed using non-parametric factorial Kruskal-

145

Wallis (KW) sum-rank test and the linear discriminate analysis (LDA) effect size (LEfSe)

146

method.  $p < 0.05$  and LDA score  $> 3.0$  are considered statistically significant.

147 **Supplementary Table 1. Sampling information and sample characteristics.**

148 Various environmental factors were monitored for each type of habitat. For faeces samples, we  
149 recorded subject metadata including intrinsic factors (e.g. gender, age, BMI), bowel habits,  
150 medication, as well as diet (e.g. smoke, drink, staple food). For wastewater samples, water  
151 quality including temperature, pH, dissolved oxygen (DO) and conductivity (EC) were measured  
152 in situ using a portable probe (HachHQ40d, Loveland, CO, USA). For soil samples, soil  
153 characteristics including water content, pH, total organic carbon (TOC), total nitrogen (TN), total  
154 carbon (TC), total phosphorus (TP) and carbon nitrogen ratio (TC/TN) were detected.

155

156 **Supplementary Table 2. Correlation between sample characteristics and particle**  
157 **concentrations of EVs.**

158 We performed pairwise Spearman correlation to analyze the correlation between particle  
159 concentrations of EVs and habitat environmental factors. In the Spearman correlation analysis  
160 between the number of bacteria and the EVs particles, the data of three habitats samples were  
161 pool together for analysis. For the other factors, correlation analysis was performed individually  
162 within respective samples. Notably, \*,  $p < 0.05$ ; \*\*,  $p < 0.01$ .

163

164 **Supplementary Table 3. The proportion of EVs-associated DNA fragments from 200 bp to**  
165 **1000 bp.**

166 The proportion of EVs-associated DNA from faeces, wastewater and soil. Size ranged from  
167 200bp to 1000bp.

168

169 **Supplementary Table 4. Metagenomic data of each sample after quality control.**

170 Based on the original sequencing data, fastp software was used to conduct data quality control,  
171 and low-quality and n-containing reads in the data were cut out to obtain high-quality sequences  
172 required for subsequent analysis. In addition, host contamination was removed from fecal  
173 samples. This table includes description of data production, including number of contigs, number  
174 of bp in contigs, contig N50, contig N90, the longest contig (Max), the shortest contig (Min),  
175 optimized reads number, optimized sequence length (bp), and their percentages.

176

177 **Supplementary Table 5. Biological proportion and classification of samples at the phylum**  
178 **level.**

179 The proportion of each sample at the level of phylum were analyzed, and the five phyla were  
180 divided into Gram-negative bacteria (GNB) and Gram-positive bacteria (GPB).

181

182 **Supplementary Table 6. Detailed information of species that were enriched in EVs.**

183 Species that were significantly enriched in EVs were selected as efficient producers (one-tailed  
184 Wilcoxon rank-sum test with FDR correction). The information includes abundance (mean and  
185 median) and *p* values for each species in both habitats and EVs samples.

186



187 **Supplementary Table 7. Detailed information of the differential KEGG profiles secreted by**  
188 **major contributors *Firmicutes* and *Proteobacteria* between EVs and habitats.**

189 The information includes Phylum, different levels of genetic description and Gene count of each  
190 encoding gene in the EVs samples. The number of gene count was the number of genes enriched  
191 in the EVs.

192

193 **Supplementary Table 8. Detailed information of enzyme encoding genes that were enriched**  
194 **in EVs.**

195 Wilcoxon unit test was used to select enzymes that were significantly enriched in EVs (one-  
196 tailed Wilcoxon rank-sum test with FDR correction). The information includes the abundance  
197 (mean and median) and *p* values of each enzyme encoding gene in the habitats and EVs samples.

198

199 **Supplementary Table 9. Detailed information of the differential enzyme encoding genes**  
200 **secreted by major contributors *Firmicutes* and *Proteobacteria* between EVs and habitats.**

201 The information includes Phylum, genetic family and Gene count of each encoding gene in the  
202 EVs samples. The number of gene count was the number of genes enriched in the EVs.

203

204

205 **References**

- 206 60 Yoon, S. H. *et al.* Introducing EzBioCloud: a taxonomically united database of 16S  
207 rRNA gene sequences and whole-genome assemblies. *Int J Syst Evol Microbiol* **67**, 1613-  
208 1617, doi:10.1099/ijsem.0.001755 (2017).
- 209 61 Tulkens, J., De Wever, O. & Hendrix, A. Analyzing bacterial extracellular vesicles in  
210 human body fluids by orthogonal biophysical separation and biochemical  
211 characterization. *Nat Protoc* **15**, 40-67, doi:10.1038/s41596-019-0236-5 (2020).
- 212 62 Zou, Y. *et al.* 1,520 reference genomes from cultivated human gut bacteria enable  
213 functional microbiome analyses. *Nat Biotechnol* **37**, 179-185, doi:10.1038/s41587-018-  
214 0008-8 (2019).
- 215
